# Supplementary material
Source: publisher site journal article supplement (https://www.dovepress.com/article/227021)
Supplement: Supplementary file 1 [file get_supplementary_file.php]

**Supplemental Appendix**

**Table S1.** Internal consistency of the Spanish TAS-20

| Instrument sections | Number of items | Mean Score | SD | Cronbach α | Cronbach α based on standardized items |
| --- | --- | --- | --- | --- | --- |
| **Factor 1**  “Difficulty identifying feelings”  (Items 1,3,6,7,9,13,14) | 7 | 20.07 | 7.856 | .862 | .864 |
| **Factor 2**  “Difficulty describing feelings”  (Items 2, 4, 11, 12, 17) | 5 | 13.73 | 4.88 | .770 | .765 |
| **Factor 3**  “Externally oriented thinking”  (Items 5,8,10,15,16,18,19,20) | 8 | 21.27 | 5.11 | .615 | .617 |
| **20-item Scale** | 20 | 55.07 | 14.07 | .854 | .841 |
| Notes: All data are presented as reliability coefficients. TAS-20, Toronto Alexithymia Scale; SD, standard deviation | | | | | |

**Table S2.** Summary of Multiple Regression Analysis

| **Variable** | **B (95% CI)** | **SEB** | **ϐ** | **p value** |
| --- | --- | --- | --- | --- |
| Intercept | 55.997 (35.378 − 76.616) | 10.376 |  | .000 |
| Age | .045 (-.187 − .277) | .117 | .040 | .698 |
| Malea | 4.053 (-1.253 − 9360) | 2.670 | .142 | .133 |
| Secondary schoolb | -3.908 (-13.340 − 5.524) | 4.746 | -.138 | .412 |
| Universityb | -16.513 (-25.881 − -7.146) | 4.714 | -.580 | .001 |
| Years with psoriasis | -.091 (-.380 − .198) | .146 | -.062 | .532 |
| PASI score | .005 (-.235 − .246) | .121 | .004 | .964 |
| Some level of non-adherence | 1.493 (-4.792 − 7.777) | 3.162 | .048 | .638 |

**Notes:** Coefficients are significant at .05 significance level. B, unstandardized regression coefficient; CI, confidence interval; SEB, standard error of the coefficient; ϐ, standardized coefficient.

1. Reference category is "female"
2. Reference category is "no education/Primary school"
